# Supplementary material for: The human SKA complex drives the metaphase-anaphase cell cycle transition by recruiting protein phosphatase 1 to kinetochores
Source: eLife journal article supplement (doi:10.7554/elife.12902), 2016-03-16
Supplement: supp [file elife-12902-supp-v1.zip]

Archive with 7 entries (7 files):
- elife_poa_e12902_Figure_5_figure_supplement_1.pdf
- elife_poa_e12902_Figure_4_figure_supplement_2.pdf
- elife_poa_e12902_Figure_7_figure_supplement_2.pdf
- elife_poa_e12902_Figure_4_figure_supplement_1.pdf
- elife_poa_e12902_Figure_4_figure_supplement_3.pdf
- elife_poa_e12902_Figure_7_figure_supplement_1.pdf
- elife_poa_e12902_Figure_3_figure_supplement_1.pdf
