# Supplementary material for: The human SKA complex drives the metaphase-anaphase cell cycle transition by recruiting protein phosphatase 1 to kinetochores
Source: eLife journal article supplement (doi:10.7554/elife.12902), 2016-03-16
Supplement: supp [file elife_poa_e12902_Figure_4_figure_supplement_2.pdf › elife_poa_e12902_Figure_4_figure_supplement_2.pdf]

GFP-Ska1 ++ -- + + -- + + --  
GFP-Ska1 $\Delta$ CTD -- + + -- + + -- + + --  
Ska1 siRNA - + - + - + - + - +

Lysate IgG IP GFP IP

GFP  
Myc-PP1

**MG132**

Normalized Myc-PP1/GFP

Cntrl si Ska1 si Cntrl si Ska1 si

GFP Ska1 GFP Ska1 $\Delta$ CTD

P<0.05 P<0.05
