# Supplementary figures and images for: The human SKA complex drives the metaphase-anaphase cell cycle transition by recruiting protein phosphatase 1 to kinetochores
Source: eLife journal article supplement (doi:10.7554/elife.12902), 2016-03-16

Figure 5 - Figure Supplement 1

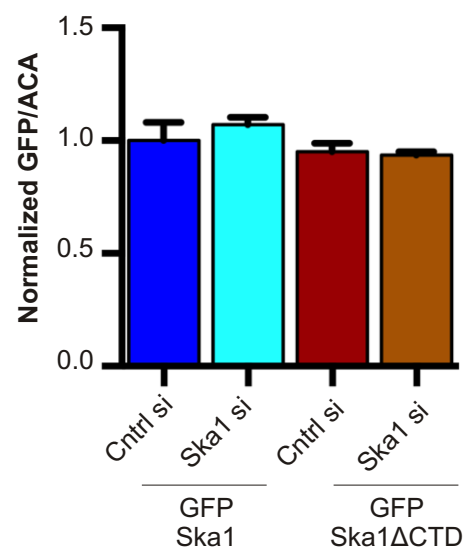

Supplement: supp [file elife-12902-supp-v1.zip › elife_poa_e12902_Figure_5_figure_supplement_1.pdf]

Figure 4 - Figure Supplement 2

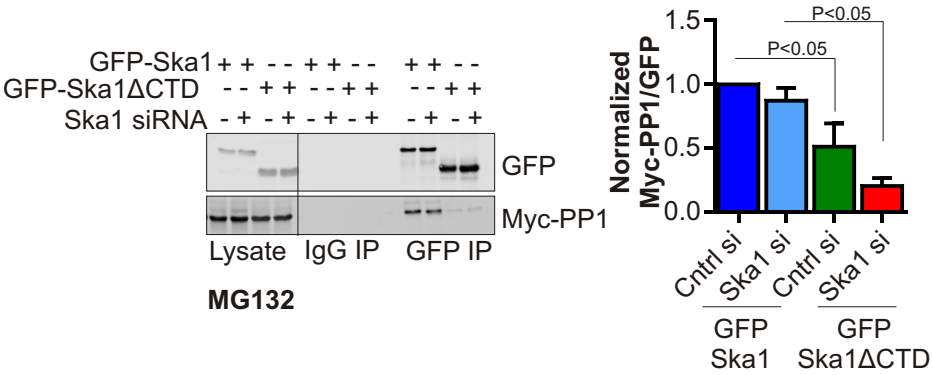

Supplement: supp [file elife-12902-supp-v1.zip › elife_poa_e12902_Figure_4_figure_supplement_2.pdf]

Figure 7 - Figure Supplement 2

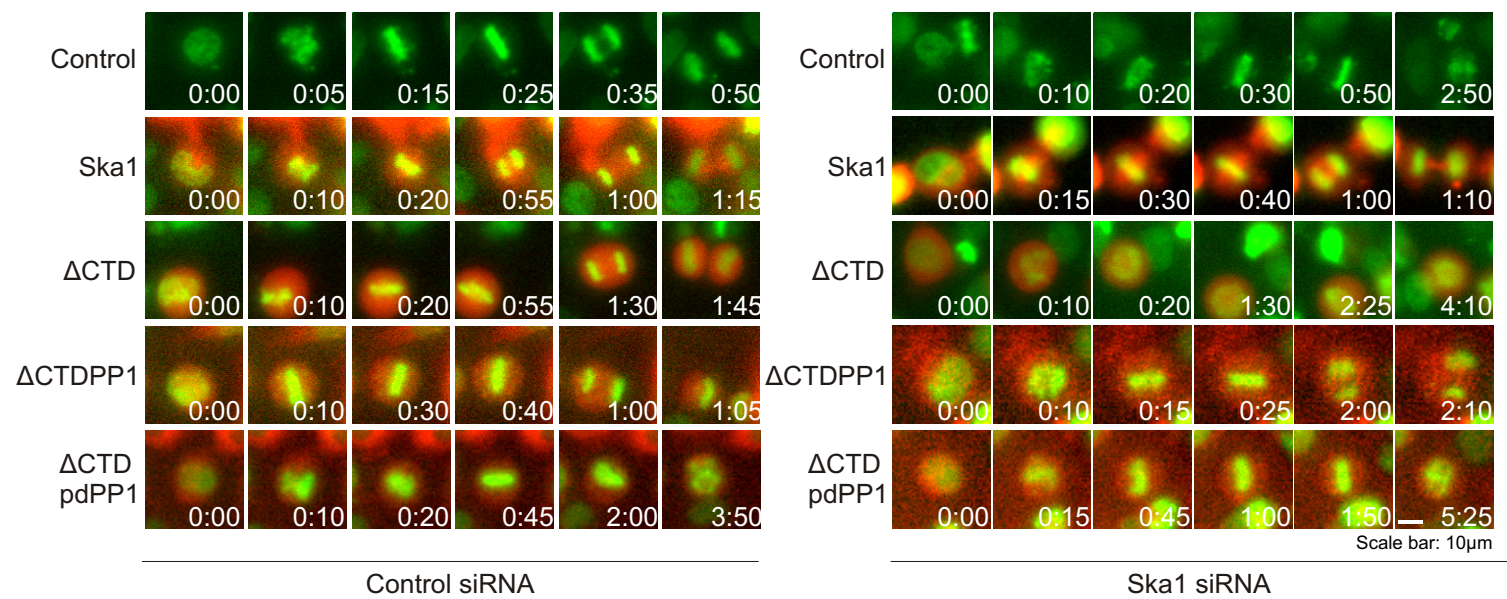

Supplement: supp [file elife-12902-supp-v1.zip › elife_poa_e12902_Figure_7_figure_supplement_2.pdf]

Figure 4 - Figure Supplement 1

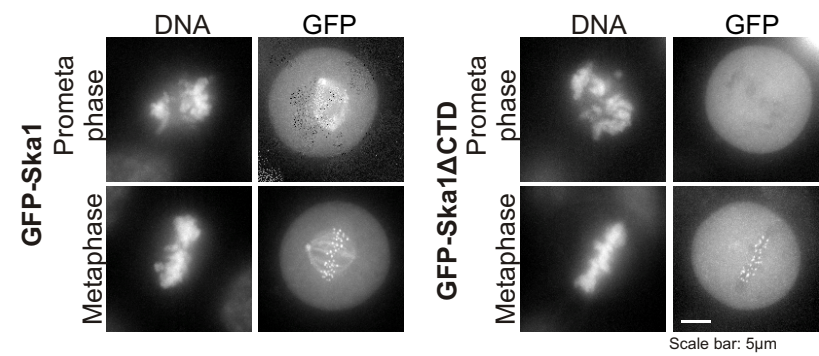

Supplement: supp [file elife-12902-supp-v1.zip › elife_poa_e12902_Figure_4_figure_supplement_1.pdf]

Figure 4 - Figure Supplement 3

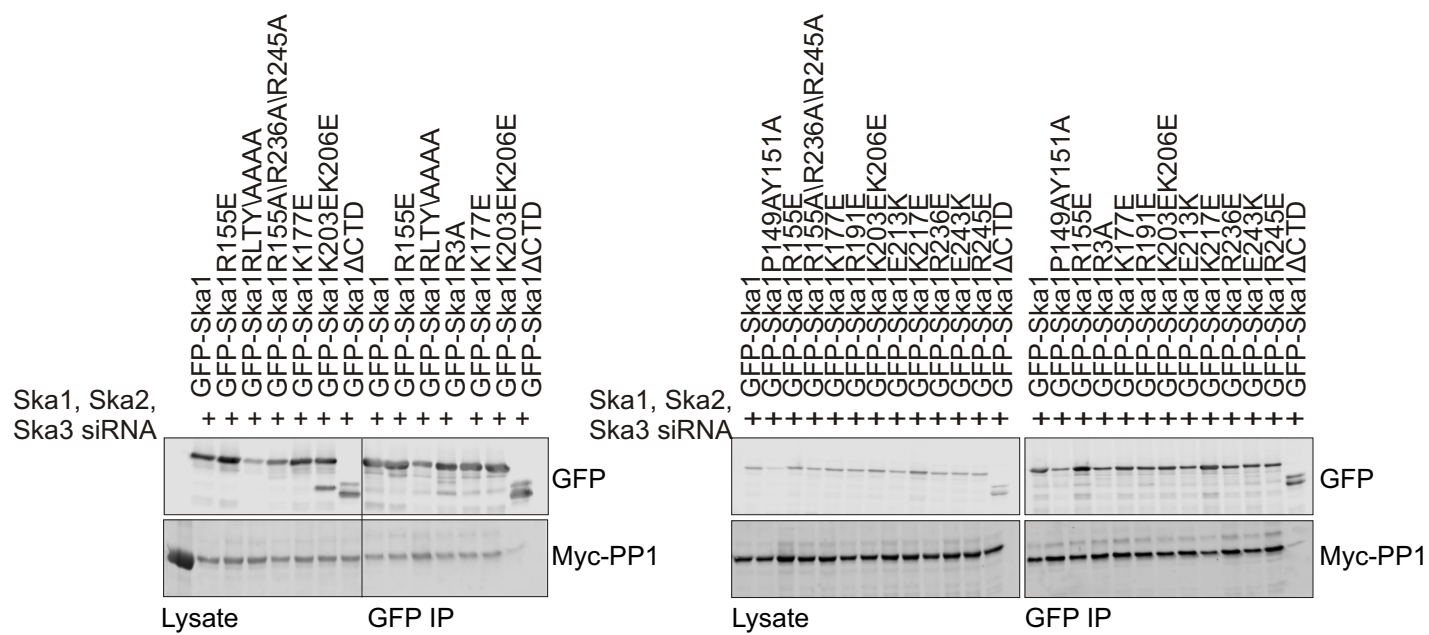

Supplement: supp [file elife-12902-supp-v1.zip › elife_poa_e12902_Figure_4_figure_supplement_3.pdf]

Figure 7 - Figure Supplement 1

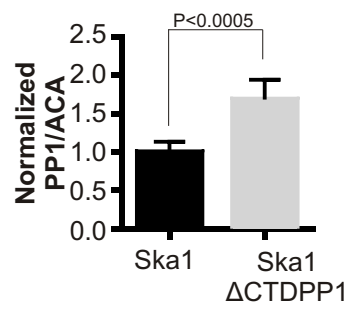

Supplement: supp [file elife-12902-supp-v1.zip › elife_poa_e12902_Figure_7_figure_supplement_1.pdf]

Figure 3 - Figure Supplement 1

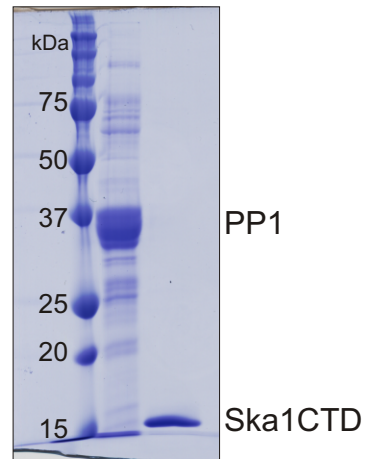

Supplement: supp [file elife-12902-supp-v1.zip › elife_poa_e12902_Figure_3_figure_supplement_1.pdf]
